# Supplementary material for: Integrative analysis of C. elegans modENCODE ChIP-seq data sets to infer gene regulatory interactions
Source: HighWire-hosted journal article supplement (doi:10.1101/gr.152876.112), 2013-03-26
Supplement: Supplemental_Figure_Legends.docx [file Supplemental_Figure_Legends.docx]

**Supplemental Figure 1. Low-complexity binding sites correlate with factor-responsive expression.** (A) Additional metrics for comparison of HLH-1 ChIP-seq targets with HLH-1 factor-responsive genes. The set of genes with HLH-1 binding sites with complexity less than or equal to *n* (for *n* = 1 to 57) were each queried for their ability to predict HLH-1-responsive genes. Red indicates positive predictive value, green indicates sensitivity, blue indicates specificity, and teal indicates the Matthews correlation. (B) SKN-1 ChIP-seq targets were compared to SKN-1-responsive genes in a similar matter to HLH-1 in (A) and Figure 3A. Orange indicates SKN-1 ChIP-seq targets in L1 larvae, and red indicates targets in L2 larvae. (C) Gene complexity does not improve the correlation with factor responsiveness compared to binding site complexity. To test whether the total number of transcription factors bound to a gene could explain the observed correlation between binding site complexity and factor-responsive expression, the analysis in Fig. 3A was repeated using a gene complexity score (defined as the number of transcription factors bound anywhere within the gene body or promoter region). Regardless of the complexity threshold, the correlation between HLH-1 binding and *hlh-1*-responsive expression using gene-based complexity (black) was always below the maximal correlation observed with binding site-based complexity (blue).

**Supplemental Figure 2. Tissue-enriched expression of transcription factor targets.** Low-complexity targets from each of 98 ChIP-seq datasets were compared against genes with tissue-enriched expression datasets ([Roy et al. 2002](#_ENREF_48); [Zhang et al. 2002](#_ENREF_69); [Colosimo et al. 2004](#_ENREF_10); [Fox et al. 2005](#_ENREF_13); [Pauli et al. 2006](#_ENREF_43); [Von Stetina et al. 2007](#_ENREF_62); [Spencer et al. 2011](#_ENREF_54)), as listed in Supplemental Table 3. Blue indicates datasets with negative Matthews correlation for a tissue-enriched gene set, whereas red indicates enriched targets. Transcription factors were hierarchically clustered along the *y-*axis; tissues (on the *x-*axis) were manually grouped into five tissue-types: Int, intestine; Hyp, hypodermis; BWM, body wall muscle, and others (not labeled).

**Supplemental Figure 3. Concordance between tissue-enriched target expression and annotated TF expression.** 13 transcription factors showed high correlation (> 0.2) with one or more tissue-enriched gene sets for neurons and neuronal subtypes (N), hypodermis (H), intestine (I), or body wall muscle (M), described in Supplemental Fig. 2. For these 13, the expression pattern of the transcription factor itself was obtained from Wormbase ([Harris et al. 2010](#_ENREF_22)). 12 of the 13 factors were expressed in the tissue in which the targets were enriched (green), whereas only one was not expressed in the predicted tissue (red). Additionally, many factors showed expression in either entire tissues (blue) or specific tissue sub-types (light blue) in which the targets were not enriched.

**Supplemental Figure 4. UNC-62 is not highly expressed in the intestine in the L3 stage ChIP-seq experiment.** The modENCODE UNC-62 L3 ChIP-seq experiment was performed on strain OP600 that contains an integrated *unc-62:GFP* transgene. Representative images indicate that *unc-62:GFP* is not yet highly expressed in the intestine in the OP600 L3 worms isolated and prepared for ChIP-seq 36 hrs after feeding from a starved population of L1 stage worms.

**Supplemental Figure 5. Comparisons of *hlh-1-*, *skn-1*-, and *unc-62*-responsive genes with ChIP-seq datasets.** As inFig. 5, targets from each of the 98 ChIP-seq datasets were compared against (A-B) 2128 genes activated by HLH-1 ([Fukushige et al. 2006](#_ENREF_15); [Fox et al. 2007](#_ENREF_14)), (C) 91 genes activated by SKN-1 ([Park et al. 2009](#_ENREF_42)), (D) 115 genes decreased upon knockdown of *unc-62* ([Van Nostrand et al. 2013](#_ENREF_61)), and (E) 67 genes increased upon knockdown of *unc-62* ([Van Nostrand et al. 2013](#_ENREF_61)). ChIP-seq datasets are listed along the *y-*axis, with the significance of overlap from a Fisher’s Exact test (or Yates’ Chi-square test where appropriate) indicated on the *x-*axis. Enrichment is indicated by positive values and depletion by negative values. Unless otherwise noted, significant (*q-value* < 10-5) low-complexity targets are used. (A) A Naïve Bayes classifier was trained independently on each ChIP-seq dataset for prediction of HLH-1-activated genes, and the training error of the 500 top scoring binding sites for each were then compared to HLH-1-activated genes. HLH-1 targets were most significantly enriched (* indicates *p* < 10-100, χ2 = 761 by Yates’ chi-squared test), with five additional factors enriched at a *p* < 10-30 cutoff. (B) One classifier was trained on HLH-1 ChIP-seq targets and HLH-1-activated genes, and then used to score binding sites in all other 97 ChIP-seq datasets. HLH-1 targets were again the most significantly enriched (* indicates *p* < 10-100, χ2 = 761 by Yates’ chi-squared test), with three additional factors enriched at a *p* < 10-30 cutoff. (C) SKN-1-activated genes were compared against all binding sites (regardless of complexity) for each ChIP-seq dataset. Only SKN-1 targets in L2 larvae were significantly enriched (1.9-fold enriched, *p* = 2.7x10-7). Note that whereas SKN-1 targets in L1 larvae was the second-most significantly enriched for SKN-1-activated genes when low-complexity targets are used (Fig. 5B), the SKN-1 (L1) dataset is missed when all targets are used. (D) Analysis of the 67 genes repressed by UNC-62 in young adults does not reveal UNC-62, indicating that most UNC-62-repressed genes are likely secondary targets. (E) Analysis of UNC-62-activated genes in young adults using the top 500 binding sites, instead of low-complexity binding sites (as in Fig. 5C) does not improve the correlation between UNC-62 ChIP-seq targets and UNC-62-activated genes.
