# Supplementary material for: Integrative analysis of C. elegans modENCODE ChIP-seq data sets to infer gene regulatory interactions
Source: HighWire-hosted journal article supplement (doi:10.1101/gr.152876.112), 2013-03-26
Supplement: Supplemental_tables.docx [file Supplemental_tables.docx]

**Supplemental Table 1. Number of binding sites for each ChIP-seq dataset.**

| ChIP-seq dataset | Alla | Significantb | Significant and low complexityc |
| --- | --- | --- | --- |
| AHA-1 (L1) | 473 | 123 | 3 |
| AHA-1 (L4) | 1449 | 343 | 20 |
| ALR-1 (L2) | 6081 | 2398 | 1076 |
| ALY-2 (L1) | 5520 | 2522 | 1081 |
| ALY-2 (L2) | 2862 | 351 | 133 |
| ALY-2 (L3) | 4186 | 1500 | 741 |
| BLMP-1 (L1) | 10072 | 7382 | 4511 |
| C01B12.2 (L2) | 9222 | 5096 | 1425 |
| C16A3.4 (L1) | 3228 | 1525 | 16 |
| CEH-14 (L2) | 5144 | 1265 | 339 |
| CEH-16 (L2) | 1846 | 676 | 209 |
| CEH-26 (LE) | 4633 | 1030 | 113 |
| CEH-30 (LE) | 5859 | 1958 | 255 |
| CES-1 (L1) | 2723 | 856 | 380 |
| CES-1 (L3) | 2579 | 542 | 229 |
| CES-1 (L4) | 2791 | 501 | 214 |
| DAF-12 (L3) | 1043 | 166 | 8 |
| DPL-1 (L1) | 4951 | 2607 | 309 |
| DPL-1 (L4) | 9610 | 4438 | 822 |
| DPY-27 (MxE) | 425 | 132 | 14 |
| EGL-27 (L1) | 3434 | 745 | 14 |
| EGL-27 (L2) | 8551 | 3120 | 549 |
| EGL-27 (L3) | 1845 | 364 | 7 |
| EGL-5 (L3) | 4631 | 1213 | 476 |
| ELT-3 (L1) | 5292 | 2731 | 967 |
| ELT-3 (L3) | 1495 | 242 | 39 |
| EOR-1 (L3) | 14520 | 11187 | 8706 |
| EOR-1 (L3b) | 6791 | 3258 | 278 |
| F16B12.6 (L1) | 1601 | 965 | 164 |
| F45C12.2 (L1) | 4636 | 2512 | 190 |
| F45C12.2 (L2) | 1486 | 372 | 3 |
| F45C12.2 (L3) | 2074 | 704 | 37 |
| FKH-2 (L3) | 2980 | 207 | 19 |
| FOS-1 (L1) | 5854 | 2405 | 201 |
| FOS-1 (L2) | 8595 | 5452 | 2422 |
| FOS-1 (L3) | 5379 | 1445 | 269 |
| FOS-1 (L4) | 3055 | 698 | 124 |
| GEI-11 (L2) | 4304 | 1594 | 318 |
| GEI-11 (L3) | 5990 | 2531 | 452 |
| GEI-11 (L4) | 683 | 222 | 101 |
| GEI-11 (YA) | 2732 | 747 | 281 |
| HAM-1 (L1) | 5607 | 3072 | 396 |
| HLH-1 (MxE) | 12437 | 4702 | 2136 |
| LIN-11 (L2) | 2329 | 738 | 48 |
| LIN-13 (MxE) | 5367 | 1897 | 315 |
| LIN-15B (L1) | 2319 | 915 | 15 |
| LIN-15B (L3) | 4120 | 2378 | 198 |
| LIN-15B (L4) | 995 | 292 | 3 |
| LIN-39 (L3) | 7345 | 3014 | 1191 |
| LIR-2 (L3) | 1719 | 196 | 18 |
| MAB-5 (L3) | 4400 | 1465 | 297 |
| MDL-1 (L1) | 9240 | 4823 | 819 |
| MEF-2 (L1) | 970 | 246 | 5 |
| MEP-1 (MxE) | 10688 | 5233 | 1746 |
| MML-1 (L3) | 382 | 114 | 12 |
| NHR-11 (L2) | 2186 | 568 | 53 |
| NHR-116 (L2) | 1359 | 211 | 118 |
| NHR-129 (L2) | 10594 | 7628 | 3997 |
| NHR-28 (L3) | 1740 | 272 | 43 |
| NHR-28 (L4) | 9354 | 6019 | 3004 |
| NHR-6 (L2) | 7682 | 3904 | 1690 |
| NHR-76 (L3) | 2660 | 471 | 59 |
| NHR-77 (L1) | 5776 | 2430 | 363 |
| NHR-77 (L2) | 3128 | 519 | 29 |
| NHR-77 (L3) | 5821 | 1278 | 265 |
| NHR-77 (L4) | 11725 | 5952 | 2292 |
| PEB-1 (L2) | 1577 | 331 | 90 |
| PES-1 (L4) | 6995 | 3000 | 661 |
| PHA-4 (L1) | 8637 | 6311 | 3192 |
| PHA-4 (L2) | 7543 | 3997 | 1438 |
| PHA-4 (L4) | 3890 | 1069 | 278 |
| PHA-4 (LE) | 8980 | 5202 | 1953 |
| PHA-4 (MxE) | 8704 | 4347 | 1426 |
| PHA-4 (stL1) | 7359 | 4803 | 2802 |
| PHA-4 (YA) | 2416 | 697 | 134 |
| PQM-1 (L3) | 5782 | 3196 | 1594 |
| R02D3.7 (L2) | 2928 | 876 | 105 |
| R02D3.7 (L3) | 7493 | 3846 | 718 |
| R02D3.7 (L4) | 2362 | 788 | 199 |
| SEA-2 (L3) | 1297 | 216 | 4 |
| SEM-4 (L2) | 7362 | 2820 | 661 |
| SKN-1 (L1) | 7302 | 3137 | 513 |
| SKN-1 (L2) | 9194 | 3044 | 970 |
| SMA-9 (L2) | 826 | 139 | 10 |
| UNC-130 (L1) | 2634 | 539 | 99 |
| UNC-62 (L1) | 1107 | 132 | 7 |
| UNC-62 (L2) | 2227 | 426 | 47 |
| UNC-62 (L3) | 4077 | 1193 | 231 |
| UNC-62 (YA) | 4358 | 1272 | 339 |
| W03F9.2 (YA) | 12065 | 5892 | 2128 |
| ZAG-1 (L1) | 2068 | 319 | 18 |
| ZAG-1 (L2) | 4001 | 1516 | 285 |
| ZAG-1 (L3) | 2214 | 577 | 22 |
| ZAG-1 (L4) | 4207 | 955 | 146 |
| ZK377.2 (L1) | 2249 | 295 | 17 |
| ZK377.2 (L2) | 4575 | 1827 | 133 |
| ZK377.2 (L3) | 2491 | 776 | 21 |
| ZK377.2 (L4) | 8088 | 4249 | 1006 |

a All binding sites identified by modENCODE (with *q-*value ≤ 0.01)

b Significant binding sites with *q-*value ≤ 10-5

c Significant and low-complexity sites with *q-*value ≤ 10-5 and complexity ≤ 8

**Supplemental Table 2. Gene Ontology analysis of HOT regions.**

| GO category | GO description | # of HOT-associated genes in GO classa | Fold-enrichment | p-value (log10)b |
| --- | --- | --- | --- | --- |
| GO:0000003 | reproduction | 98 | 6.00 | -86.61 |
| GO:0002119 | nematode larval development | 86 | 5.65 | -69.98 |
| GO:0009792 | embryo development ending in birth or egg hatching | 111 | 4.55 | -68.70 |
| GO:0040007 | growth | 68 | 5.34 | -50.74 |
| GO:0040010 | positive regulation of growth rate | 63 | 4.19 | -33.41 |
| GO:0005622 | intracellular | 37 | 5.89 | -30.80 |
| GO:0006898 | receptor-mediated endocytosis | 32 | 5.71 | -25.53 |
| GO:0040035 | hermaphrodite genitalia development | 35 | 5.30 | -25.39 |
| GO:0040011 | locomotion | 50 | 4.07 | -25.22 |
| GO:0005840 | ribosome | 20 | 20.33 | -15.66 |
| GO:0003735 | structural constituent of ribosome | 20 | 19.72 | -15.66 |
| GO:0006412 | translation | 21 | 13.21 | -15.64 |
| GO:0010171 | body morphogenesis | 24 | 4.10 | -12.04 |
| GO:0008340 | determination of adult lifespan | 23 | 3.54 | -9.21 |
| GO:0018996 | molting cycle, collagen and cuticulin-based cuticle | 15 | 5.60 | -6.69 |
| GO:0005524 | ATP binding | 23 | 2.91 | -6.58 |
| GO:0040027 | negative regulation of vulval development | 12 | 6.89 | -6.34 |
| GO:0018991 | oviposition | 14 | 5.41 | -6.11 |
| GO:0005737 | cytoplasm | 13 | 5.54 | -5.82 |
| GO:0040018 | positive regulation of multicellular organism growth | 14 | 4.56 | -5.29 |
| GO:0003746 | translation elongation factor activity | 4 | 52.86 | -5.24 |
| GO:0015935 | small ribosomal subunit | 4 | 52.86 | -5.24 |

a Genes were associated with HOT regions if the HOT region was within 1kb upstream or downstream of the annotated transcription start site

b Significance of overlap was determined by Fisher’s Exact test, or approximated by Yates’ chi-square test where appropriate (see Methods)

**Supplemental Table 3. Tissue-enriched gene sets used.**

| Tissue | Reference | method | # of genes |
| --- | --- | --- | --- |
| AFD and AWD neurons (emb) | Colosimo, M.E., *et al*. (2004) | FACS sorted cellsa | 563 |
| motor neurons (emb) | Fox, R.M., *et al*. (2005) | FACS sorted cells | 810 |
| A-class neurons (emb) | Von Stetina, S.E., *et al*. (2007) | FACS sorted cells | 895 |
| pan-neuronal (emb) | Von Stetina, S.E., *et al*. (2007) | FACS sorted cells | 1491 |
| A-class neurons (L2) | Von Stetina, S.E., *et al*. (2007) | mRNA-taggingb | 373 |
| pan-neuronal (L2) | Von Stetina, S.E., *et al*. (2007) | mRNA-tagging | 1383 |
| touch neurons (emb) | Zhang, Y., *et al*. (2002) | FACS sorted cells | 61 |
| BAG neurons (EE) | Spencer, W.C., *et al*. (2011) | FACS sorted cells | 454 |
| A-class neurons (L2) | Spencer, W.C., *et al*. (2011) | mRNA-tagging | 692 |
| GABA neurons (L2) | Spencer, W.C., *et al*. (2011) | mRNA-tagging | 132 |
| glr-1+ neurons (L2) | Spencer, W.C., *et al*. (2011) | mRNA-tagging | 662 |
| pan-neuronal (L2) | Spencer, W.C., *et al*. (2011) | mRNA-tagging | 1012 |
| dopaminergic neurons (L3-L4) | Spencer, W.C., *et al*. (2011) | mRNA-tagging | 1232 |
| PVD/OLL neurons (L3-L4) | Spencer, W.C., *et al*. (2011) | mRNA-tagging | 878 |
| A-class neurons (LE) | Spencer, W.C., *et al*. (2011) | FACS sorted cells | 393 |
| AVA neurons (LE) | Spencer, W.C., *et al*. (2011) | FACS sorted cells | 540 |
| AVE neurons (LE) | Spencer, W.C., *et al*. (2011) | FACS sorted cells | 433 |
| dopaminergic neurons (LE) | Spencer, W.C., *et al*. (2011) | FACS sorted cells | 474 |
| GABA neurons (LE) | Spencer, W.C., *et al*. (2011) | FACS sorted cells | 364 |
| pan-neuronal (LE) | Spencer, W.C., *et al*. (2011) | FACS sorted cells | 459 |
| germline precursors (EE) | Spencer, W.C., *et al*. (2011) | FACS sorted cells | 974 |
| excretory cell (L2) | Spencer, W.C., *et al*. (2011) | mRNA-tagging | 528 |
| coelomocytes (L2) | Spencer, W.C., *et al*. (2011) | mRNA-tagging | 228 |
| coelomocytes (LE) | Spencer, W.C., *et al*. (2011) | FACS sorted cells | 576 |
| pharyngeal muscle (LE) | Spencer, W.C., *et al*. (2011) | FACS sorted cells | 598 |
| CEPsh (YA) | Spencer, W.C., *et al*. (2011) | mRNA-tagging | 296 |
| bodywall muscle (L2) | Spencer, W.C., *et al*. (2011) | mRNA-tagging | 1148 |
| bodywall muscle (LE) | Spencer, W.C., *et al*. (2011) | FACS sorted cells | 397 |
| non-pharyngeal muscle (L1) | Roy, P., *et al*. (2002) | mRNA-tagging | 1127 |
| hypodermis (LE) | Spencer, W.C., *et al*. (2011) | FACS sorted cells | 739 |
| hypodermis (L3-L4) | Spencer, W.C., *et al*. (2011) | mRNA-tagging | 1248 |
| intestine (L2) | Spencer, W.C., *et al*. (2011) | mRNA-tagging | 945 |
| intestine (LE) | Spencer, W.C., *et al*. (2011) | FACS sorted cells | 887 |
| intestine (L4) | Pauli, F., *et al*. (2006) | mRNA-tagging | 1597 |

a The FACS sorting method to identify embryonic cells expressing a tissue-specific promoter is described in Zhang, Y., *et al*. (2002) ([Zhang et al. 2002](#_ENREF_69))

b The mRNA-tagging method to preferentially pull down mRNAs expressed in a desired tissue is described in Roy, P., *et al*. (2002) ([Roy et al. 2002](#_ENREF_48))

**Supplemental Table 4. Lifespan effect of RNAi treatment of putative aging regulatory transcription factors.**

| Strain | RNAi | N | Mean lifespan | Standard error | % lifespan extension | *p-*valuea |
| --- | --- | --- | --- | --- | --- | --- |
| N2 | *empty vector* | 134 | 19.12 | 0.32 | - | - |
| N2 | *fos-1* | 122 | 17.97 | 0.36 | -6.0 | 0.024 |
| N2 | *C01B12.2* | 67 | 19.4 | 0.53 | 1.5 | 0.15 |
| N2 | *nhr-77* | 66 | 19.64 | 0.47 | 2.7 | 0.25 |
| N2 | *empty vector* | 267 | 20.55 | 0.3 | - | - |
| N2 | *skn-1* | 135 | 18.22 | 0.24 | -11.3 | < 10-8 |
| N2 | *C01B12.2* | 112 | 20.82 | 0.49 | 1.3 | 0.33 |
| N2 | *nhr-28* | 123 | 20.16 | 0.38 | -1.9 | 0.18 |
| N2 | *nhr-77* | 128 | 22.03 | 0.45 | 7.2 | 0.0036 |
| N2 | *unc-62* | 55 | 24.36 | 0.88 | 18.5 | 5.5x10-8 |
| N2 | *empty vector* | 75 | 15.03 | 0.51 | - | - |
| N2 | *pqm-1* | 64 | 14.31 | 0.43 | -4.8 | 0.0916 |
| N2 | *elt-3* | 39 | 17.05 | 0.9 | 13.4 | 0.0266 |
| N2 | *nhr-76* | 54 | 13.74 | 0.36 | -8.6 | 0.0325 |

a *p-*values were calculated in Oasis ([Yang et al. 2011](#_ENREF_65)) using the log-rank test.

**Supplemental Table 5. Lifespan of strains over-expressing putative aging regulatory transcription factors.**

| Strain | Transcription Factor | N | Mean lifespan | Standard error | % lifespan extensiona | *p-*valuea |
| --- | --- | --- | --- | --- | --- | --- |
| SD1876 (OP317 2x b.c.b) | *nhr-28* | 103 | 23.9 | 0.67 | 18.3 | < 10-5 |
| SD1886 (RW11108 2x b.c.b) | *-*c | 62 | 17.81 | 0.74 |  |  |
| SD1896 (RW11206 2x b.c.b) | *-* | 120 | 20.2 | 0.51 |  |  |
| SD1895 (RW10780 2x b.c.b) | *-* | 103 | 18.9 | 0.43 |  |  |
| SD1891 (OP203 2x b.c.b)d | *nhr-76* | 102 | 22.2 | 0.86 | 6.7 | 0.0014 |
| SD1895 (RW10780 2x b.c.b)d | *-* | 121 | 20.8 | 0.5 |  |  |
| SD1896 (RW11206 2x b.c.b)d | *-* | 129 | 19.2 | 0.55 |  |  |
| OP317 | *nhr-28* | 138 | 22.3 | 0.44 | 8.3 | < 10-5 |
| OP304 | *fos-1* | 111 | 17.3 | 0.4 | -17.3 |  |
| OP343 | *C01B12.2* | 121 | 16.2 | 0.41 | -21.5 |  |
| OP178 | *skn-1* | 128 | 20.1 | 0.58 | -2.3 |  |
| RW10384 | - | 53 | 20.6 | 0.63 |  |  |
| RW11206 | - | 126 | 18.5 | 0.41 |  |  |
| OP353 | *nhr-77* | 141 | 14.4 | 0.35 | -26.6 |  |
| OP317 | *nhr-28* | 134 | 22.8 | 0.34 | 16.7 | < 10-5 |
| OP203 | *nhr-76* | 64 | 22.9 | 1.31 | 17.2 | < 10-5 |
| RW11108 | *-* | 139 | 14.8 | 0.32 |  |  |
| RW11206 | *-* | 141 | 19.5 | 0.33 |  |  |
| RW10780 | *-* | 142 | 17.3 | 0.42 |  |  |
| RW10384 | *-* | 142 | 17.1 | 0.5 |  |  |
| OP203 | *nhr-76* | 32 | 21.8 | 1.55 | 13.0 | 0.0004 |
| OP600 | *unc-62* | 63 | 20.4 | 0.94 | 5.9 | 0.0259 |
| OP75 | *elt-3* | 74 | 18.0 | 0.55 | -6.5 |  |
| OP201 | *pqm-1* | 79 | 17.4 | 0.66 | -9.9 |  |
| RW10384 | *-* | 85 | 19.3 | 0.47 |  |  |
| RW11108 | *-* | 98 | 18.1 | 0.54 |  |  |
| RW11206 | *-* | 85 | 18.3 | 0.48 |  |  |

a *p-*values were calculated in Oasis ([Yang et al. 2011](#_ENREF_65)) using the log-rank test. Lifespan extensions as well as *p-*values shown are compared to the longest-living control strain assayed in the same experiment.

b Indicated strains were controls backcrossed twice to wild-type (N2) as follows: SD1876 (backcrossed OP317), SD1886 (backcrossed RW11108), SD1896 (backcrossed RW11026), and SD1895 (backcrossed RW10780).

c Controls were *unc-119(ed3)* worms containing a low-copy integrated rescue of wild-type *unc-119*, as well as a promoter fusion to histone protein-tagged mCherry (and thus do not over-express a transcription factor). Controls were further selected as strains in which mCherry expression was dim or absent.

d Palmitic acid (10 mg/mL) was added in a ring around the edge of the plates to prevent worms from leaving the plate, as *nhr-76* over-expression appears to cause a social behavior defect.
